# Supplementary material for: Representation of Racial and Ethnic Minority Populations in Dementia Prevention Trials: A Systematic Review
Source: bioRxiv or medRxiv preprint supplement (doi:10.1101/2021.05.18.21257411), 2021-05-20
Supplement: Supplementary file [file media-3.pdf]

Table 1. Characteristics of Eligible Studies

| Table 1                                  | Race/Ethnicity Reported (n=26) | Race/Ethnicity Not Reported (n=16) |
|------------------------------------------|--------------------------------|------------------------------------|
| Sample size, median (range)              | 289 (56 – 48835)               | 68 (18 – 6377)                     |
| Weighted Mean Age, median yr,<br>(range) | 73 (52 – 82)                   | 70 (58 – 88)                       |
| % Females, median (range)                | 69 (22 – 100)                  | 64 (55 – 78)                       |
| Females, median n (Range)                | 230 (34 – 48835)               | 41 (10 – 72)                       |
| % Race/Ethnicity<br>median (range)       |                                |                                    |
| American Indian or Alaska Native         | 0.4 (0.2 – 0.4)                | --                                 |
| Asian                                    | 2.0 (0.6 – 11.9)               | --                                 |
| Biracial                                 | --                             | --                                 |
| Black or African American                | 10.8 (1.1 – 94.5)              | --                                 |
| Hispanic Ethnicity (any race)            | 9.6 (0.9 – 100)                | --                                 |
| Hawaii Native or Pacific Islander        | 0.1 (0.1 – 0.1)                | --                                 |
| Other or Unspecified                     | 4.9 (0.7 – 42.9)               | --                                 |
| White, non-Hispanic                      | 84.8 (57.1 – 97.2)             | --                                 |
| Race/Ethnicity<br>median n (range)       |                                |                                    |
| American Indian or Alaska Native         | 16 (5 – 203)                   | --                                 |
| Asian                                    | 47 (16 – 1107)                 | --                                 |
| Biracial                                 | --                             | --                                 |
| Black or African American                | 77 (2 – 5266)                  | --                                 |
| Hispanic Ethnicity (any race)            | 53 (2 – 1854)                  | --                                 |
| Hawaii Native or Pacific Islander        | 3 (3 -3)                       | --                                 |
| Other or Unspecified                     | 26 (3 – 646)                   | --                                 |

|                               |                  |    |
|-------------------------------|------------------|----|
| White, non-Hispanic           | 197 (55 – 39759) | -- |
| Intervention Language, n      |                  |    |
| English                       | 24               | 16 |
| Spanish                       | 1                | 0  |
| English and Spanish           | 1                | 0  |
| Funding                       |                  |    |
| Industry                      | 2                | 0  |
| Intramural                    | 1                | 0  |
| Mixed                         | 4                | 7  |
| National Institutes of Health | 17               | 3  |
| Private                       | 3                | 1  |
| Unknown                       | 0                | 5  |

Some combination of race and/or ethnicity was reported in 26 studies. Number or percentage of individuals who were white were reported in 23 trials, Black or African American in 15 trials, Asian in 6 trials, American Indian or Alaska Native in 3 trials, Hawaii Native or Pacific Islander in 1 trial. Hispanic ethnicity was reported in 10 trials and appeared to be included as a separate ethno-racial category with no overlap with race. Funding identification based on sources listed in text.
